# Supplementary material
Source: PubMed Central journal article supplement (PMC2409043)
Supplement: pp.108.118935_1.pdf [file pp.108.118935_1.pdf]

Movies S1. 3-D rendering of single cells (in magenta) of apple (a) and pear (b) with adjacent voids (in yellow). Cut planes in gray. Images obtained from phase contrast tomography at 700 nm resolution. While the voids lie like wires of a tight net around the smaller pear cell, a small number of larger voids connect in an irregular disconnected pattern to the apple cell.

Movies S2. 3-D rendering of the void network of apple (a) and pear (b) cortex. While the voids between apple parenchyma are large and form an incompletely connected network, those of pear are very small and form a complete network throughout the cortex sample without preferential direction.
